# Supplementary material for: Etiology and Management of Raised Intraocular Pressure following Posterior Chamber Phakic Intraocular Lens Implantation in Myopic Eyes
Source: PubMed Central journal article supplement (PMC5113895; doi:10.1371/journal.pone.0165469), 2016-11-17

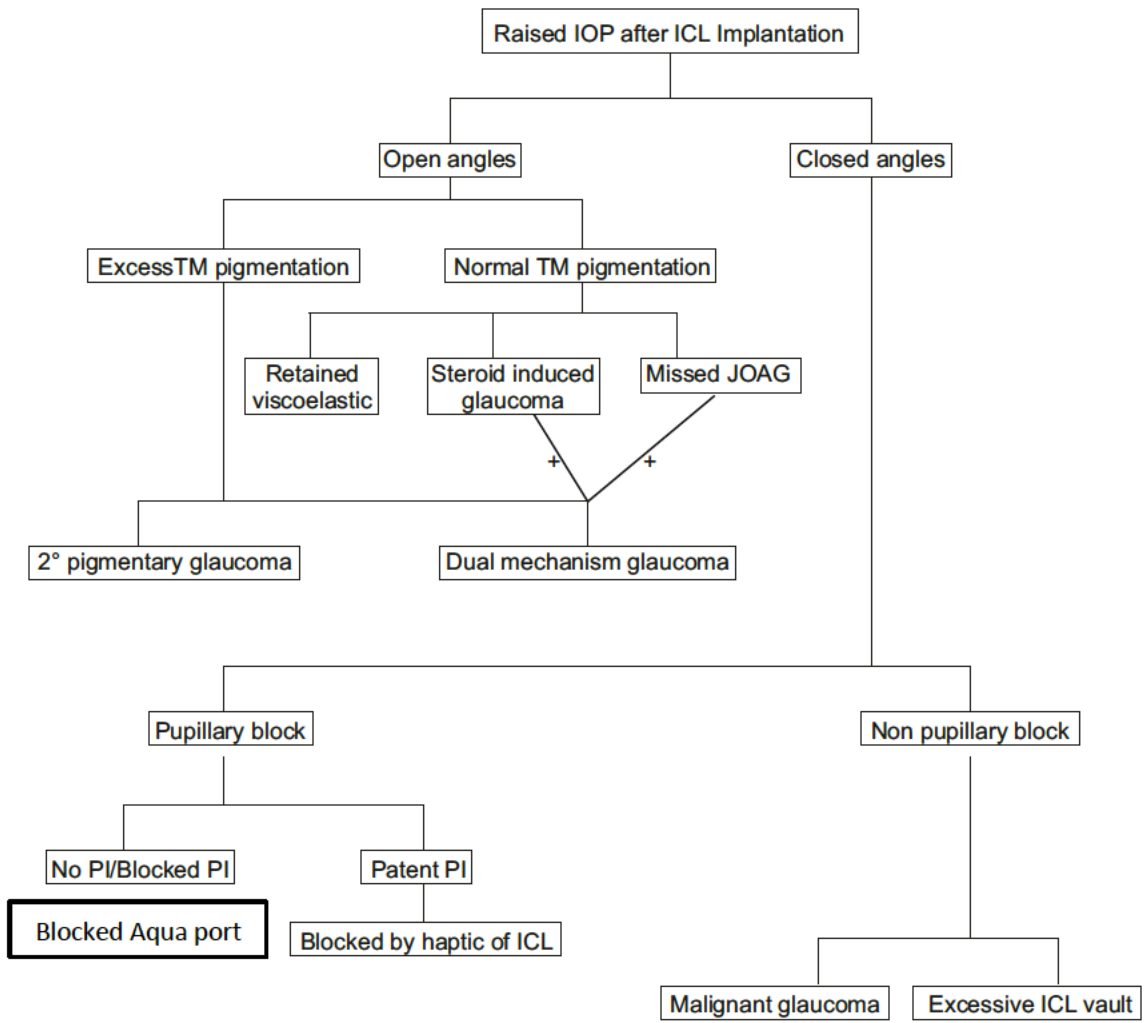

Supplement: pone.0165469.s001.pdf [file pone.0165469.s001.pdf]
